# Supplementary material for: Mapping the Performance of a Small Mixing-type Condensation Particle Counter
Source: Copernicus journal article supplement (doi:10.5194/egusphere-2025-5526), 2026-02-20
Supplement: Supplementary file [file egusphere-2025-5526-AC3-supplement.pdf]

Formulas:

$$D_{p, kel} = \frac{4\sigma v_m}{k_b T \ln S_r} \quad (2)$$

$$\eta_{act} = \frac{\int_0^{R_{act}} 2\pi r w(r) N(r) dr}{Q_a N_0} \quad (3)$$

Pictures:

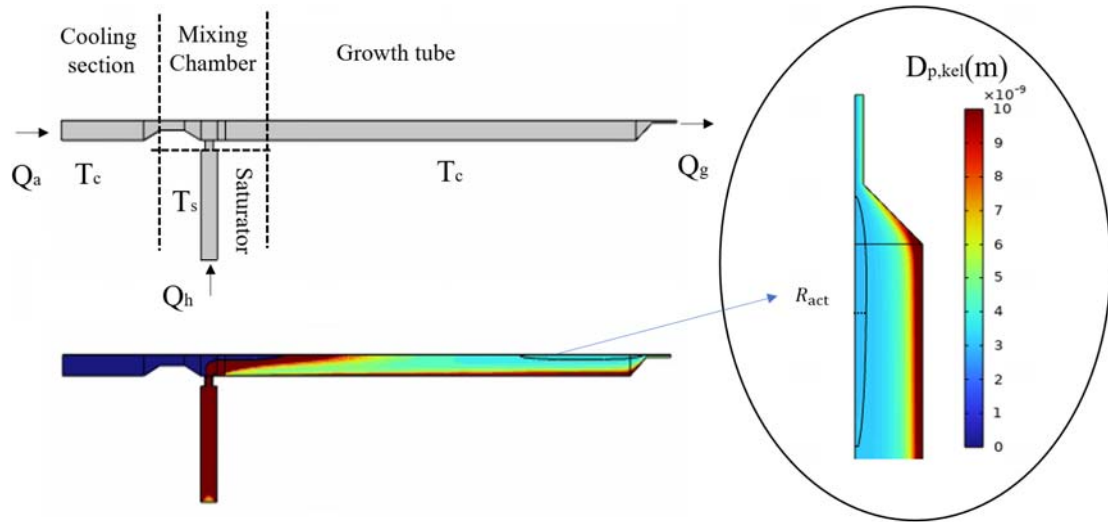

**Figure 2.** Computational domain for modeling the sMCPC performance and a typical distribution of the equilibrium Kelvin-diameter

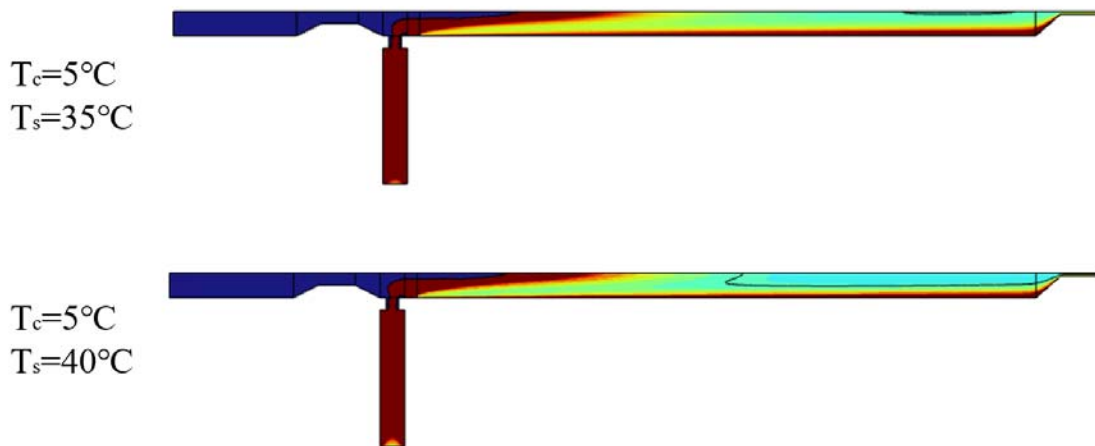

**Figure 8.** Comparison of activation regions for particles with the same diameter in the sMCPC under different temperature settings

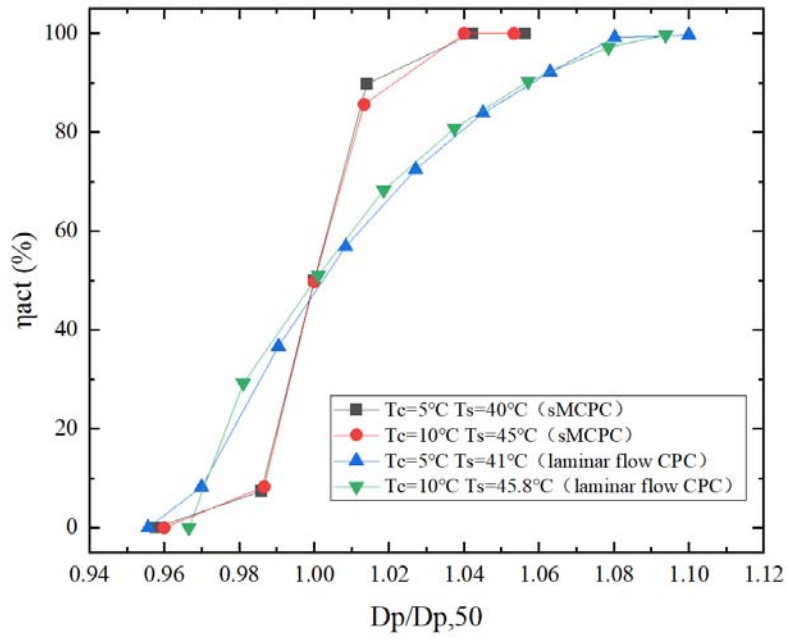

**Figure 13.** Comparison of the activation efficiency curves for sMCPC and laminar flow CPC
